# Supplementary material for: Genome-wide association study identifies genetic factors that modify age at onset in Machado-Joseph disease
Source: publisher site journal article supplement (doi:10.18632/aging.102825), 2020-03-23
Supplement: Supplementary file [file aging-v12i6-102825-supplementary-material-SD1.pdf]

## SUPPLEMENTARY FIGURES

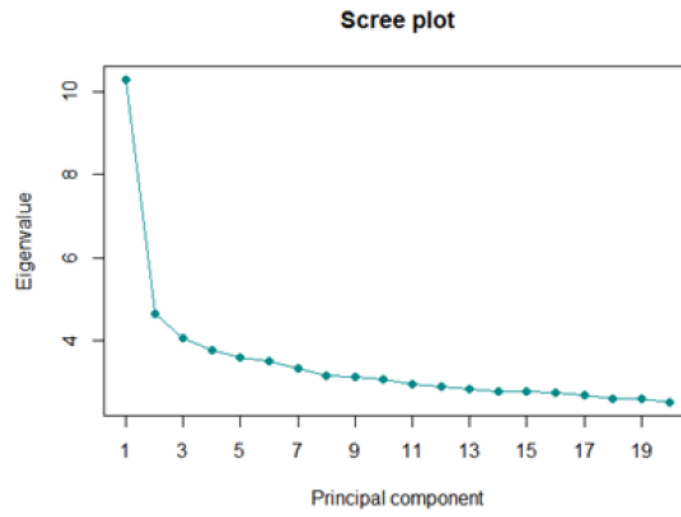

**Supplementary Figure 1. Scree plot showing the eigenvalues of the first 20 principal components (PCs).** This plot indicates that the first three PCs explain the majority of the variability in data.

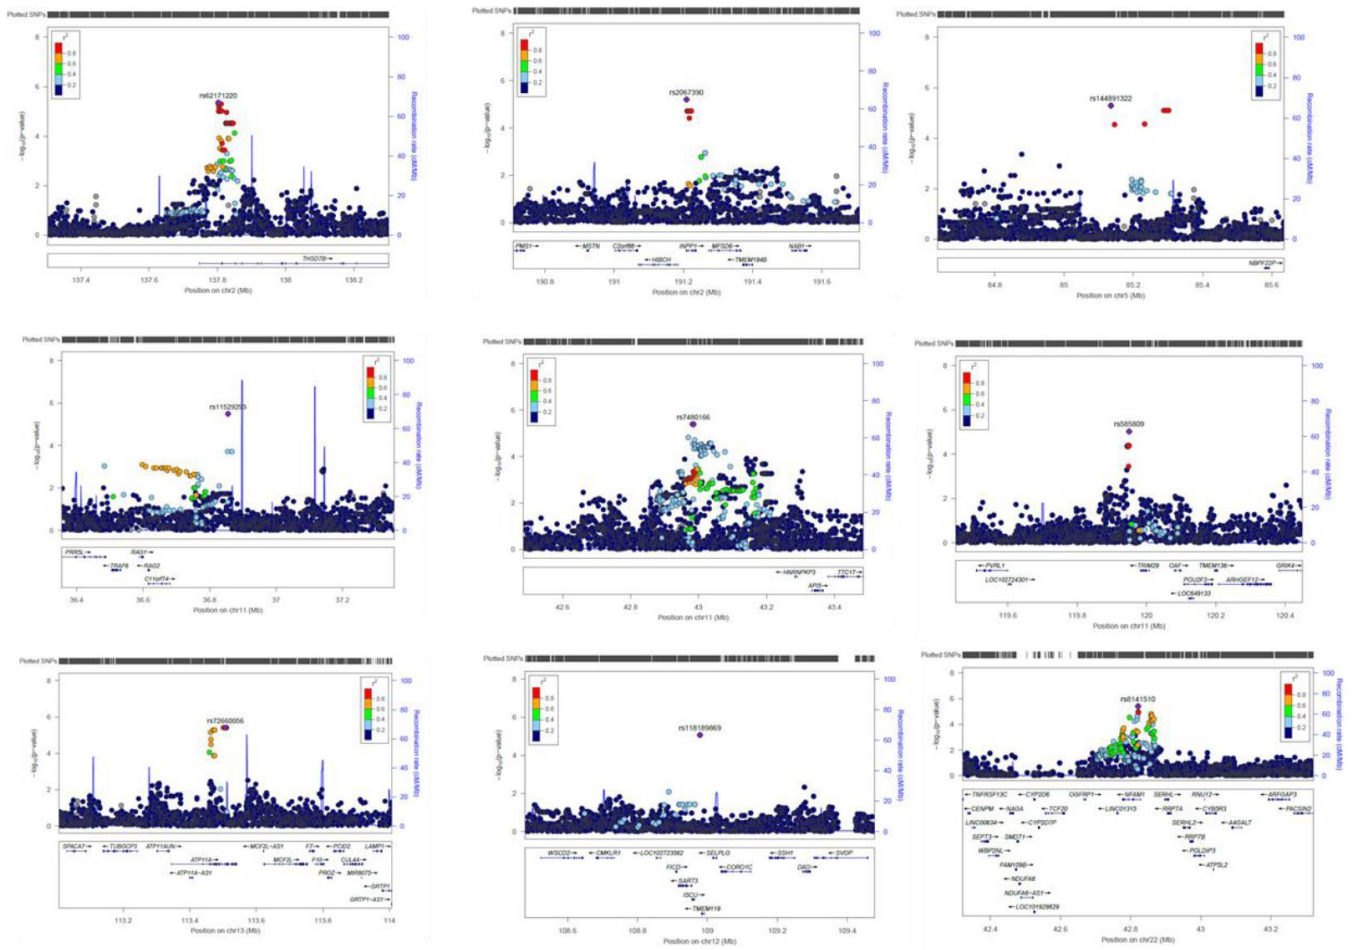

**Supplementary Figure 2. Regional LocusZoom plots for the nine modifier loci that modify AO of MJD.** Purple line indicates the genetic recombination rate (cM/Mb). SNPs in linkage disequilibrium with identified are shown in color gradient indicating  $r^2$  levels (hg19, 1KGP, Nov 2014, EUR).
