# Supplementary material for: Genome-wide association study identifies genetic factors that modify age at onset in Machado-Joseph disease
Source: publisher site journal article supplement (doi:10.18632/aging.102825), 2020-03-23
Supplement: Supplementary file [file aging-v12i6-102825-supplementary-material-SD2.pdf]

## SUPPLEMENTARY TABLES

**Supplementary Table 1. Linear relationship between AO and CAG<sub>exp</sub>, CAG<sub>nor</sub>, geographical origin, sex and pairwise interaction of the given factors. A total of 62.7 % of the variability in the AO is explained by given factors.**

| Model description                                                                                                                                              | Multiple R <sup>2</sup> | Adjusted R <sup>2</sup> | P-value                  | ΔR <sup>2</sup> |
|----------------------------------------------------------------------------------------------------------------------------------------------------------------|-------------------------|-------------------------|--------------------------|-----------------|
| AO ~ CAG <sub>exp</sub>                                                                                                                                        | 0.6200                  | 0.6195                  | <2.2 × 10 <sup>-16</sup> |                 |
| AO ~ CAG <sub>exp</sub> + origin                                                                                                                               | 0.6241                  | 0.6216                  | <2.2 × 10 <sup>-16</sup> | 0.0021          |
| AO ~ CAG <sub>exp</sub> + origin + sex                                                                                                                         | 0.6265                  | 0.6235                  | <2.2 × 10 <sup>-16</sup> | 0.0019          |
| AO ~ CAG <sub>exp</sub> + origin + sex + CAG <sub>nor</sub>                                                                                                    | 0.6282                  | 0.6247                  | <2.2 × 10 <sup>-16</sup> | 0.0012          |
| AO ~ CAG <sub>exp</sub> + origin + sex + CAG <sub>nor</sub> + CAG <sub>exp</sub> :CAG <sub>nor</sub>                                                           | 0.6301                  | 0.6261                  | <2.2 × 10 <sup>-16</sup> | 0.0014          |
| AO ~ CAG <sub>exp</sub> + origin + sex + CAG <sub>nor</sub> + CAG <sub>exp</sub> :CAG <sub>nor</sub> + CAG <sub>exp</sub> :origin                              | 0.6328                  | 0.6267                  | <2.2 × 10 <sup>-16</sup> | 0.0006          |
| AO ~ CAG <sub>exp</sub> + origin + sex + CAG <sub>nor</sub> + CAG <sub>exp</sub> :CAG <sub>nor</sub> + CAG <sub>exp</sub> :origin + CAG <sub>nor</sub> :origin | 0.6352                  | 0.6271                  | <2.2 × 10 <sup>-16</sup> | 0.0004          |

**Supplementary Table 2. Subjects and cohort demographics.**

| Geographical origin | # of patients | Mean (SD) AO | M:F |
|---------------------|---------------|--------------|-----|
| Portugal            | 330           | 40.0 (±12.4) | 1.0 |
| Brazil              | 311           | 34.9 (±11.7) | 1.1 |
| North America       | 55            | 37.8 (±12.2) | 0.7 |
| Germany             | 51            | 37.6 (±9.2)  | 1.2 |
| NA                  | 34            | 37.1 (±11.1) | 1.4 |
| Australia           | 5             | 52.8 (±10.1) | 0.3 |

M:F - male-female ratio.

**Supplementary Table 5. Gene sets and pathways enriched in i-GSEA4GWAS.**

| Pathway/Gene set name                                                      | Gene Set ID   | P-value | FDR    |
|----------------------------------------------------------------------------|---------------|---------|--------|
| GO: TRANSPORT VESICLE                                                      | GO:0030133    | 0.001   | 0.0082 |
| KEGG: OLFACTORY TRANSDUCTION                                               | hsa04740      | 0.001   | 0.0083 |
| Olfactory Signaling Pathway                                                | R-HSA-381753  | 0.001   | 0.0088 |
| GO: SYNAPSE PART                                                           | GO:0044456    | 0.001   | 0.0093 |
| Synthesis of bile acids and bile salts via 24-hydroxycholesterol           | R-HSA-193775  | 0.001   | 0.0095 |
| Negative feedback regulation of MAPK pathway                               | R-HSA-5674499 | 0.001   | 0.0101 |
| Purine salvage                                                             | R-HSA-74217   | 0.001   | 0.0106 |
| GO: METALLOEXOPEPTIDASE ACTIVITY                                           | GO:0008235    | 0.001   | 0.0109 |
| GO: SYNAPSE                                                                | GO:0045202    | 0.001   | 0.0115 |
| GO: MONOCARBOXYLIC ACID TRANSPORT                                          | GO:0015718    | 0.001   | 0.0133 |
| GO: OUTER MEMBRANE                                                         | GO:0019867    | 0.001   | 0.0141 |
| GO: AMINOPEPTIDASE ACTIVITY                                                | GO:0004177    | 0.001   | 0.015  |
| Localization of the PINCH-ILK-PARVIN complex to focal adhesions            | R-HSA-446343  | 0.001   | 0.0159 |
| BioCarta: PLATELETAPP PATHWAY                                              | M6487         | 0.001   | 0.0161 |
| GO: EXOPEPTIDASE ACTIVITY                                                  | GO:0008238    | 0.001   | 0.018  |
| TFAP2 (AP-2) family regulates transcription of other transcription factors | R-HSA-8866906 | 0.001   | 0.0212 |

|                                                                  |               |       |        |
|------------------------------------------------------------------|---------------|-------|--------|
| GO: MITOCHONDRIAL OUTER MEMBRANE                                 | GO:0005741    | 0.001 | 0.0215 |
| GO: ORGANELLE OUTER MEMBRANE                                     | GO:0031968    | 0.003 | 0.0216 |
| GO: HISTONE DEACETYLASE COMPLEX                                  | GO:0000118    | 0.001 | 0.0218 |
| Fanconi Anemia Pathway                                           | R-HSA-6783310 | 0.001 | 0.0221 |
| GO: PROTEASOME COMPLEX                                           | GO:0000502    | 0.001 | 0.0221 |
| GO: RECEPTOR MEDIATED ENDOCYTOSIS                                | GO:0006898    | 0.001 | 0.0225 |
| GO: GABA RECEPTOR ACTIVITY                                       | GO:0016917    | 0.001 | 0.0226 |
| Metabolism of Angiotensinogen to Angiotensins                    | R-HSA-2022377 | 0.001 | 0.0231 |
| GO: TRANS GOLGI NETWORK TRANSPORT VESICLE                        | GO:0030140    | 0.001 | 0.0236 |
| Calcitonin-like ligand receptors                                 | R-HSA-419812  | 0.001 | 0.0242 |
| GO: MONOCARBOXYLIC ACID TRANSMEMBRANE<br>TRANSPORTER ACTIVITY    | GO:0008028    | 0.001 | 0.0245 |
| HDL remodeling                                                   | R-HSA-8964058 | 0.001 | 0.0262 |
| Synthesis of epoxy (EET) and dihydroxyecosatrienoic acids (DHET) | R-HSA-2142670 | 0.001 | 0.0263 |
| GO: RESPONSE TO HORMONE STIMULUS                                 | GO:0009725    | 0.001 | 0.0273 |
| GO: PEPTIDE METABOLIC PROCESS                                    | GO:0006518    | 0.004 | 0.0348 |
| GRB7 events in ERBB2 signaling                                   | R-HSA-1306955 | 0.001 | 0.0348 |
| Mitochondrial Uncoupling Proteins                                | R-HSA-166187  | 0.008 | 0.0354 |
| The fatty acid cycling model                                     | R-HSA-167826  | 0.008 | 0.0354 |
| The proton buffering model                                       | R-HSA-167827  | 0.008 | 0.0354 |
| ATF6 (ATF6-alpha) activates chaperone genes                      | R-HSA-381183  | 0.002 | 0.037  |
| GO: GOLGI ASSOCIATED VESICLE                                     | GO:0005798    | 0.003 | 0.0371 |
| Free fatty acids regulate insulin secretion                      | R-HSA-400451  | 0.001 | 0.0374 |
| GO: XENOBIOTIC METABOLIC PROCESS                                 | GO:0006805    | 0.001 | 0.0382 |
| GO: DENDRITE                                                     | GO:0030425    | 0.001 | 0.0386 |
| Beta-oxidation of pristanoyl-CoA                                 | R-HSA-389887  | 0.001 | 0.0413 |
| Toxicity of botulinum toxin type D (BoNT/D)                      | R-HSA-5250955 | 0.001 | 0.0414 |
| Toxicity of botulinum toxin type F (BoNT/F)                      | R-HSA-5250981 | 0.001 | 0.0414 |
| Processing and activation of SUMO                                | R-HSA-3215018 | 0.001 | 0.0416 |
| KEGG: NUCLEOTIDE EXCISION REPAIR                                 | hsa03420      | 0.001 | 0.0422 |
| GO: RESPONSE TO XENOBIOTIC STIMULUS                              | GO:0009410    | 0.001 | 0.0462 |
